# Supplementary material
Source: PubMed Central journal article supplement (PMC8800123)
Supplement: mmc5.pdf [file mmc5.pdf]

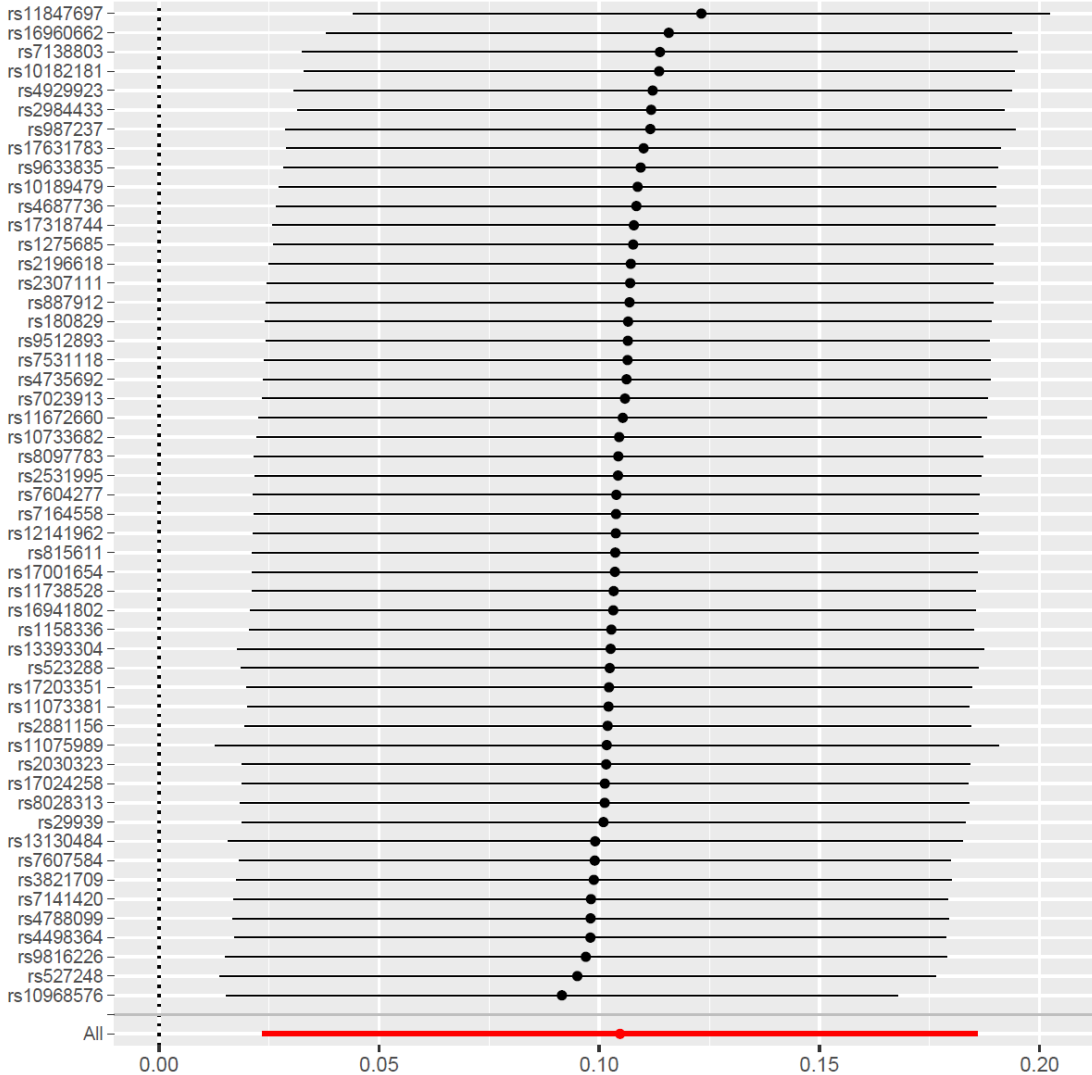

Supplementary Figure 1 MR leave-one-out sensitivity analysis (MRBase) for class 1 obesity on COVID-19 Hospitalization

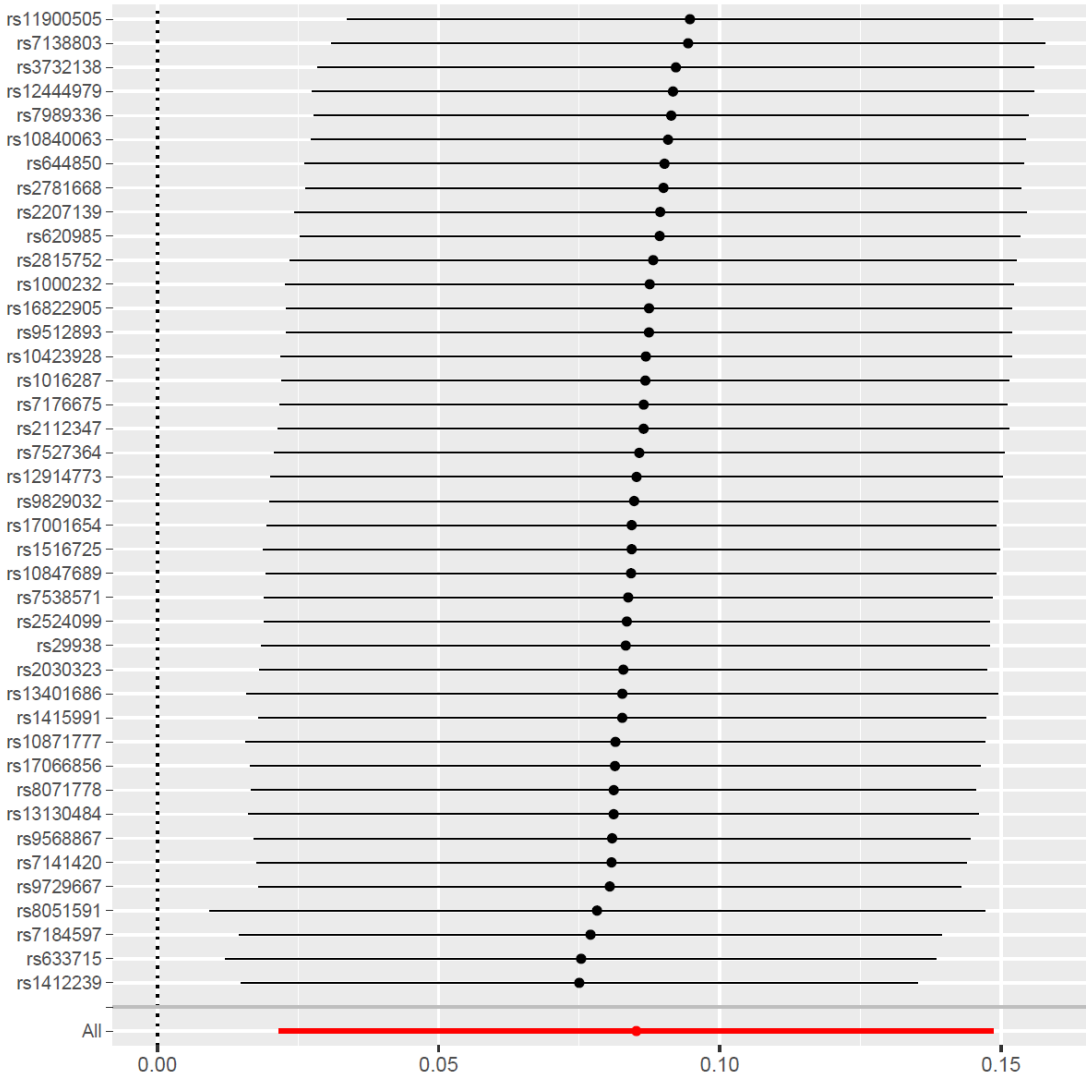

Supplementary Figure 2 MR leave-one-out sensitivity analysis (MRBase) for class 2 obesity on COVID-19 Hospitalization

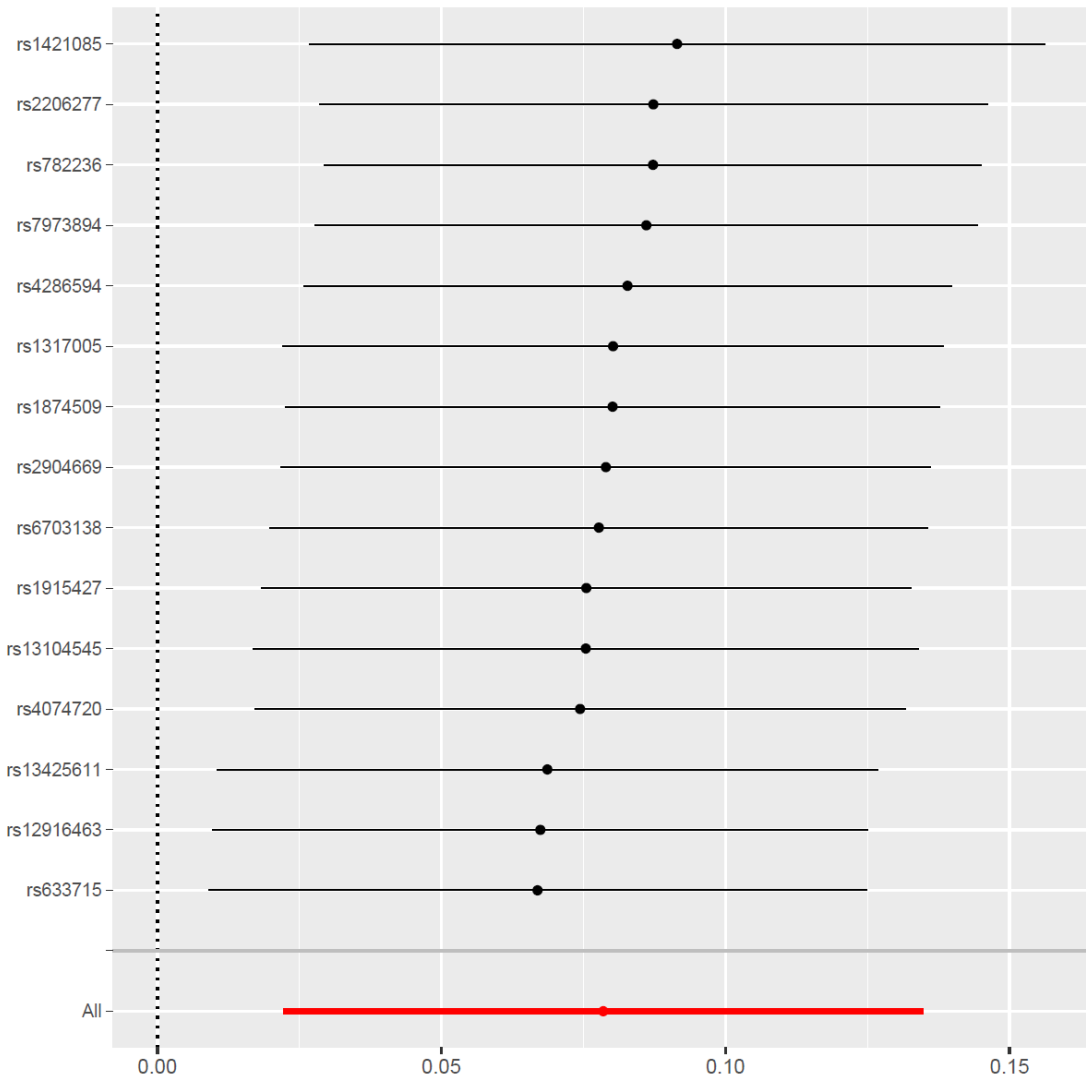

Supplementary Figure 3 MR leave-one-out sensitivity analysis (MRBase) for class 3 obesity on COVID-19 Hospitalization

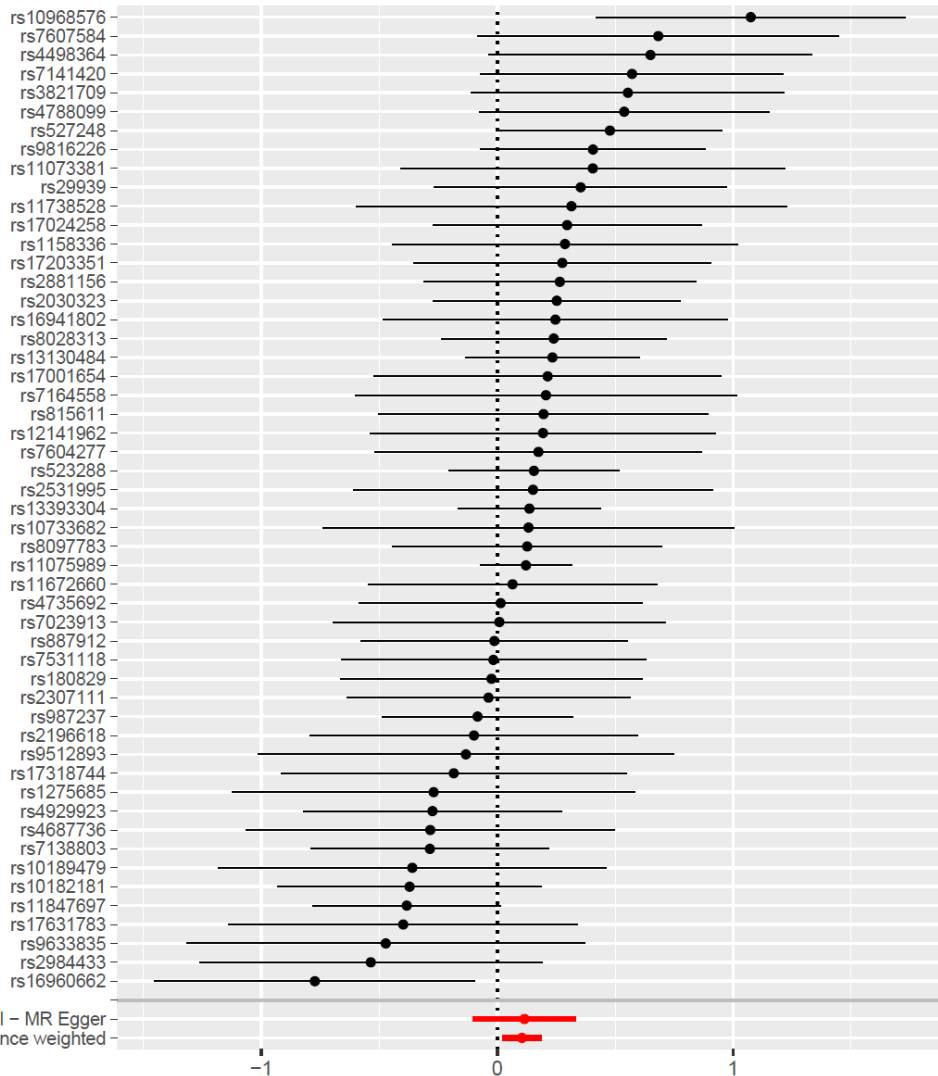

Supplementary Figure 4 MR effect size forest plot (MRBase) for class 1 obesity on COVID-19 Hospitalization

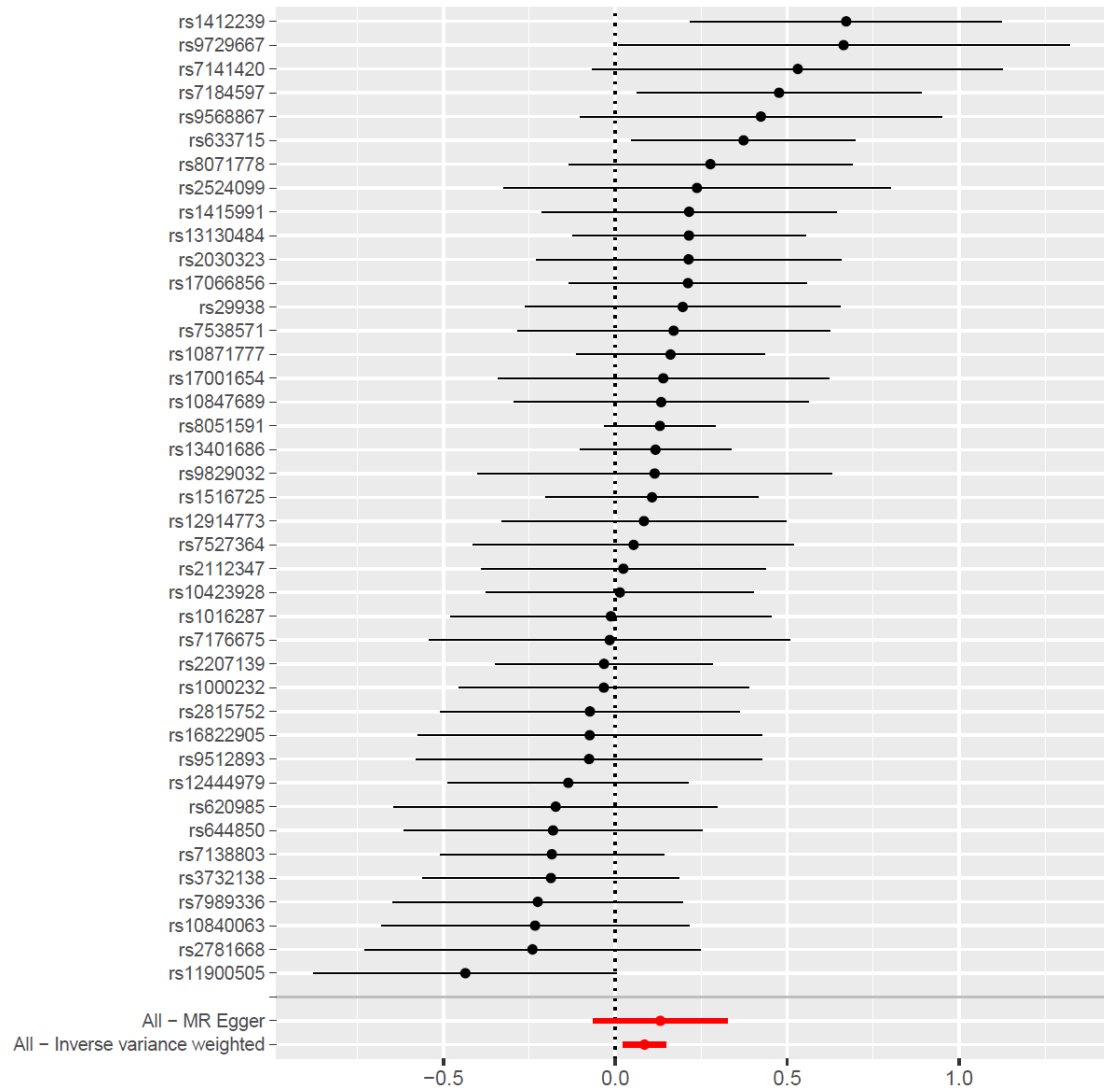

Supplementary Figure 5 MR effect size forest plot (MRBase) for class 2 obesity on COVID-19 Hospitalization

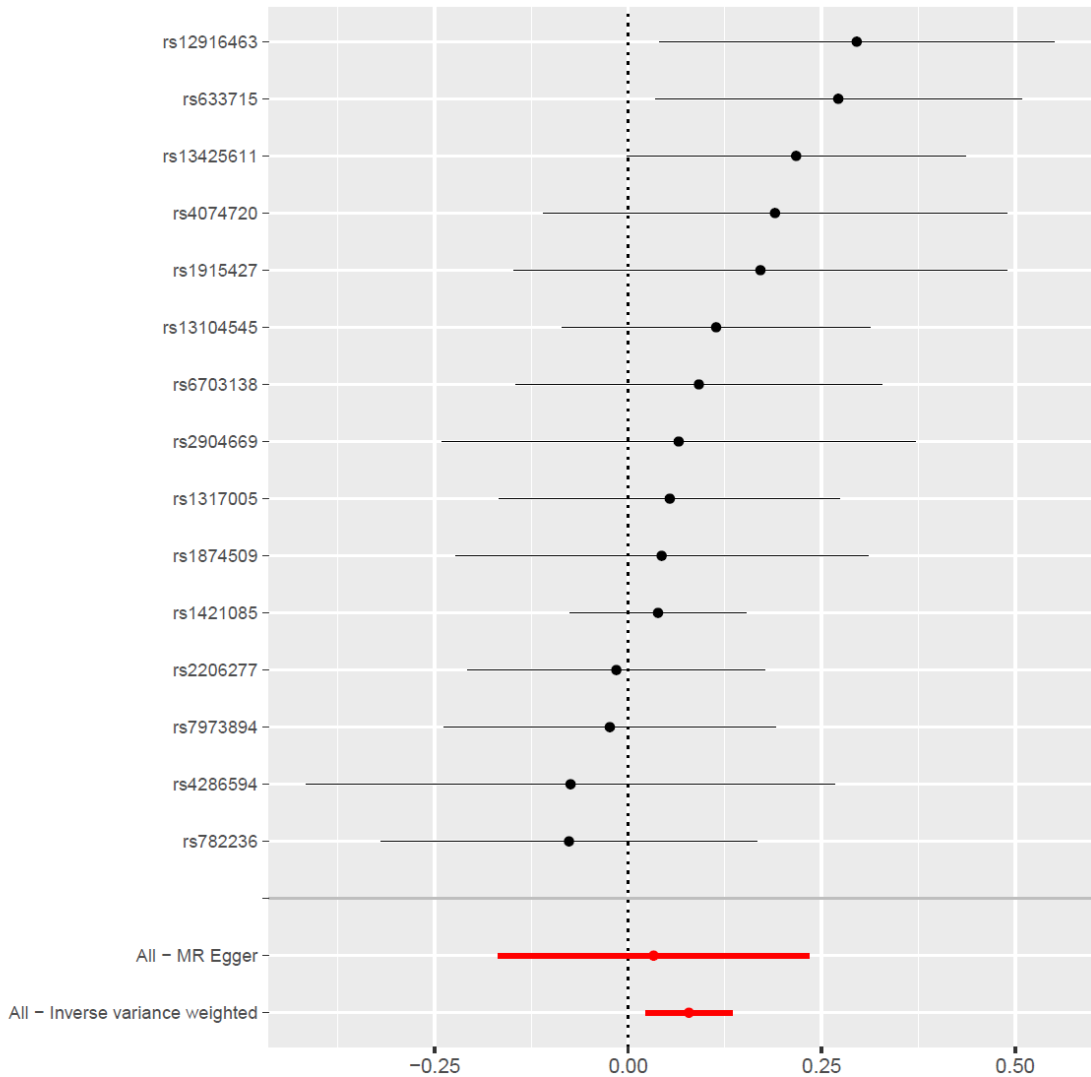

Supplementary Figure 6 MR effect size forest plot (MRBase) for class 3 obesity on COVID-19 Hospitalization

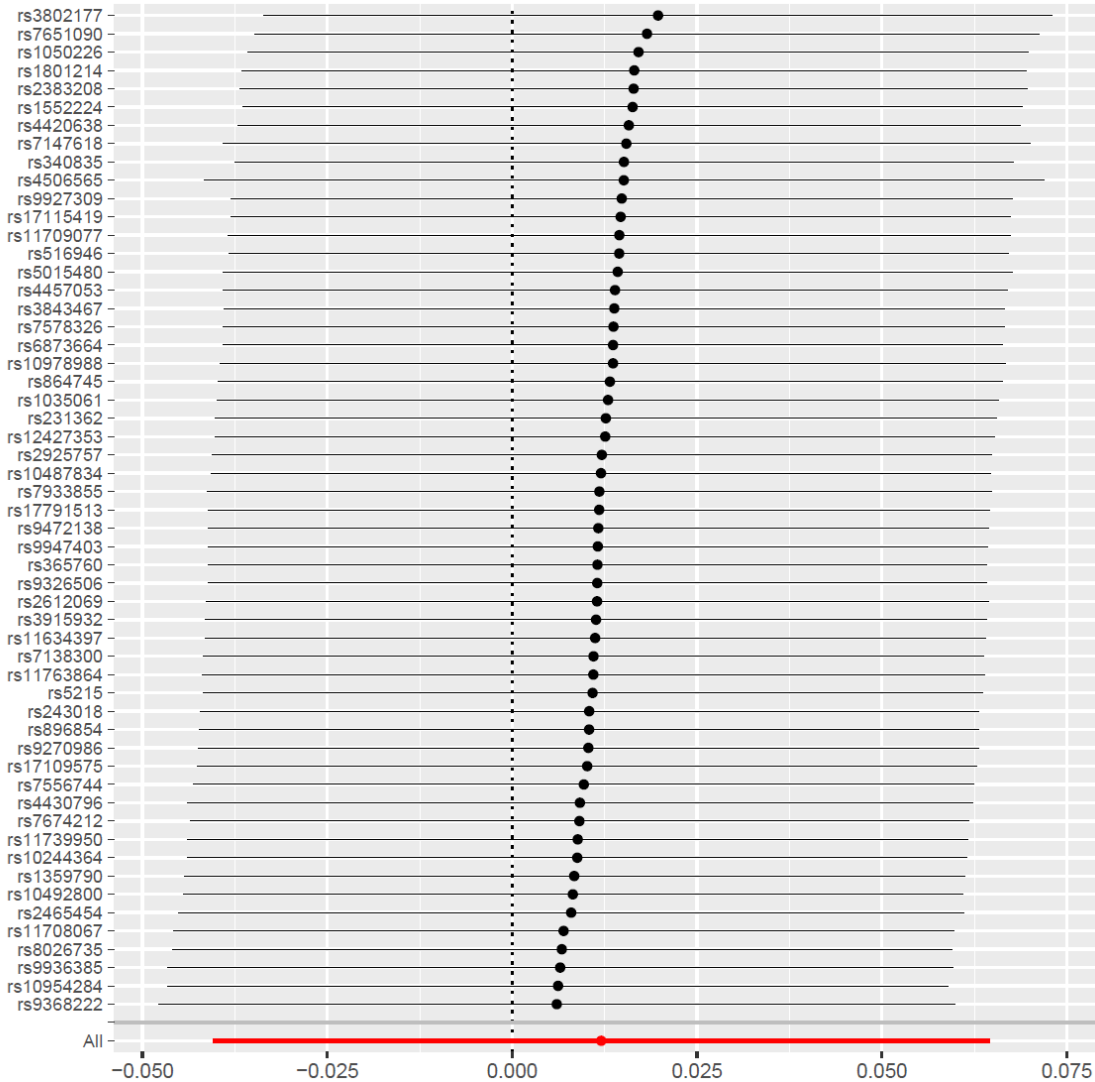

Supplementary Figure 7 MR leave-one-out sensitivity analysis (MRBase) for T2D on COVID-19 Hospitalization

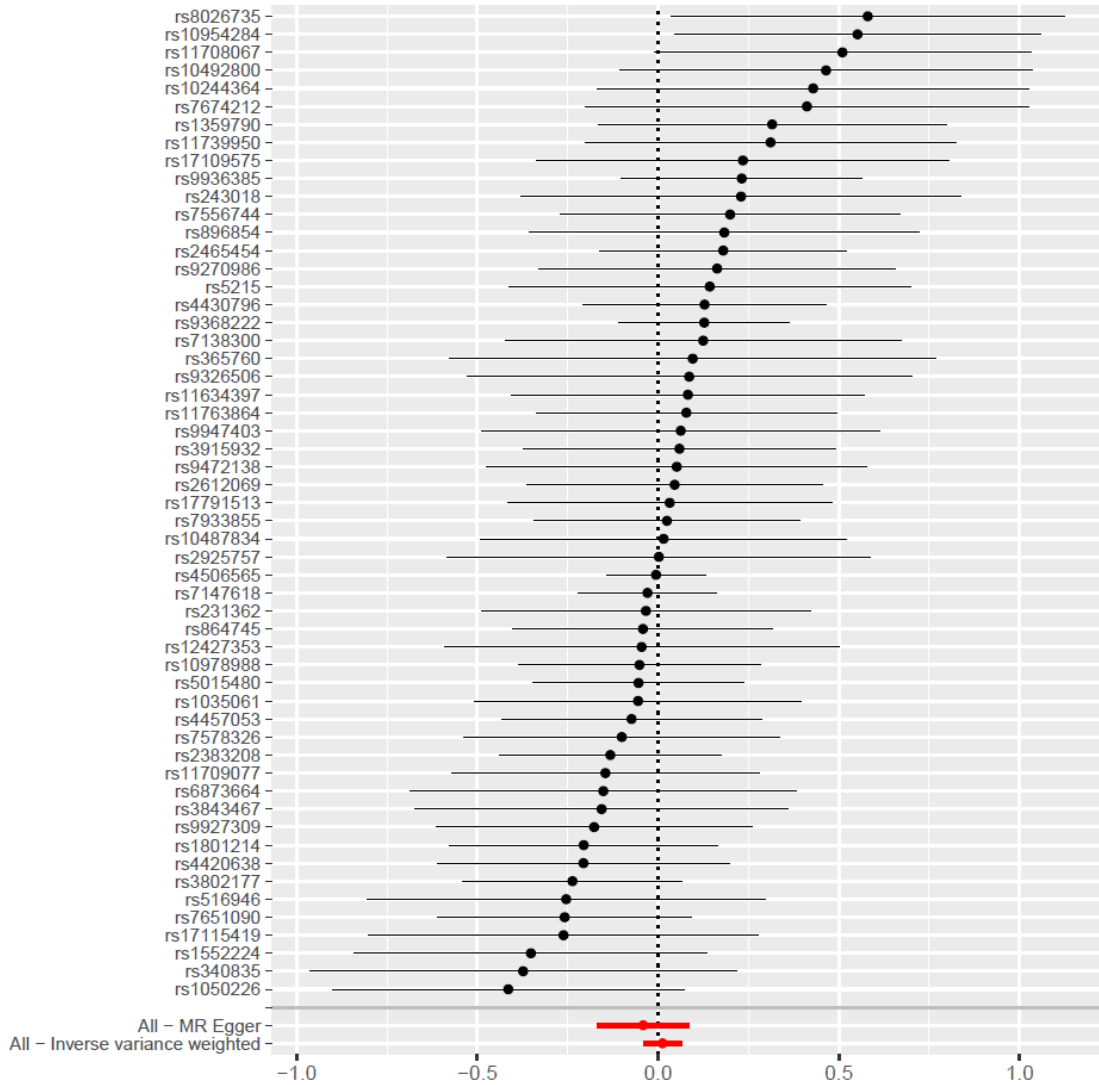

Supplementary Figure 8 MR effect size forest plot (MRBase) for T2D on COVID-19 Hospitalization
